# Supplementary material for: Prevalence of Alpha(α)-Thalassemia in Southeast Asia (2010–2020): A Meta-Analysis Involving 83,674 Subjects
Source: MDPI journal article supplement (doi:10.3390/ijerph17207354), 2020-10-09
Supplement: s1 [file s1]

**Table S4:** The SCOPUS literature (N = 152) included in the analysis.

| Title                                                                                                                                                                      | Authors                                                                                                                          | DOI                           |
|----------------------------------------------------------------------------------------------------------------------------------------------------------------------------|----------------------------------------------------------------------------------------------------------------------------------|-------------------------------|
| Molecular Epidemiology of Hemoglobinopathies in Cambodia                                                                                                                   | Munkongdee T., Tanakulmas J., Butthep P., Winichagoon P., Main B., Yiannakis M., George J., Devenish R., Fucharoen S., Svasti S. | 10.3109/03630269.2016.1158723 |
| Progress Toward the Control and Management of the Thalassemias                                                                                                             | Fucharoen S., Weatherall D.J.                                                                                                    | 10.1016/j.hoc.2015.12.001     |
| Hematological Practice in Hong Kong and China                                                                                                                              | Kwong Y.-L., Ha S.-Y., Chan V.                                                                                                   | 10.1016/j.hoc.2015.11.010     |
| Prevalence of $\alpha$ -thalassaemia genotypes in pregnant women in northern Thailand                                                                                      | Pharephan S., Sirivatanapa P., Makonkawkeyoon S., Tuntiwechapikul W., Makonkawkeyoon L.                                          | 10.4103/0971-5916.182622      |
| Thalassemia screening using different automated blood cell counters: Consideration of appropriate cutoff values                                                            | Chaitraiphop C., Sanchaisuriya K., Inthavong S., Fucharoen G., Sanchaisuriya P., Changtrakun Y., Fucharoen S.                    | 10.7754/Clin.Lab.2015.150720  |
| Characterization of Deletions of the HBA and HBB Loci by Array Comparative Genomic Hybridization                                                                           | Sabath D.E., Bender M.A., Sankaran V.G., Vamos E., Kentsis A., Yi H.-S., Greisman H.A.                                           | 10.1016/j.jmoldx.2015.07.011  |
| Prevalence of thalassemia carriers among the Lahu hill tribe population, Chiang Rai, Thailand                                                                              | Apidechkul T.                                                                                                                    | 10.5372/1905-7415.0904.423    |
| Molecular spectrum of $\alpha$ -globin gene mutations in the Aegean region of Turkey: first observation of three $\alpha$ -globin gene mutations in the Turkish population | Onay H., Aykut A., Karaca E., Durmaz A., Solmaz A.E., Çoğulu Ö., Aydınok Y., Vergin C., Özkinay F.                               | 10.1007/s12185-015-1796-y     |
| Discrimination of various thalassemia syndromes and iron deficiency and utilization of reticulocyte measurements in monitoring response to iron therapy                    | Winichagoon P., Kumbunlue R., Sirankapracha P., Boonmongkol P., Fucharoen S.                                                     | 10.1016/j.bcmed.2015.01.010   |
| The spectrum of $\alpha$ -thalassemia mutations in Kermanshah Province, West Iran                                                                                          | Alibakhshi R., Mehrabi M., Omidniakan L., Shafieenia S.                                                                          | 10.3109/03630269.2015.1070732 |
| The prevalence and spectrum of $\alpha$ -Thalassemia in Guizhou Province of South China                                                                                    | Huang S.-W., Xu Y., Liu X.-M., Zhou M., Li G.-F., An B.-Q., Su L., Wu X., Lin J.                                                 | 10.3109/03630269.2015.1041037 |
| Sonographic markers of fetal $\alpha$ -thalassemia major                                                                                                                   | Li X., Zhou Q., Zhang M., Tian X., Zhao Y.                                                                                       | 10.7863/ultra.34.2.197        |
| Interaction of Hb Grey Lynn (Vientiane) [ $\alpha$ 91(FG3)Leu>Phe ( $\alpha$ 1)] with Hb E [ $\beta$ 26(B8) Glu>Lys] and $\alpha$ +thalassemia:                            | Singha K., Fucharoen G., Fucharoen S.                                                                                            | 10.7754/Clin.Lab.2014.141112  |

|                                                                                                                                                                |                                                                                                                                                             |                               |
|----------------------------------------------------------------------------------------------------------------------------------------------------------------|-------------------------------------------------------------------------------------------------------------------------------------------------------------|-------------------------------|
| Molecular and hematological analysis                                                                                                                           |                                                                                                                                                             |                               |
| Validation of the immunochromatographic strip for $\alpha$ -thalassemia screening: A multicenter study                                                         | Winichagoon P., Kumpan P., Holmes P., Finlayson J., Newbound C., Kabral A., Li B., Nuinoon M., Fawcett T., Tayapiwatana C., Kasinrerak W., Fucharoen S.     | 10.1016/j.trsl.2014.10.013    |
| Detection of deletion $\alpha$ +-thalassemia mutation [- $\alpha$ (3.7), - $\alpha$ (4.2)] by quantitative PCR assay                                           | Seeratanachot T., Shimbhu D., Charoenkwan P., Sanguansermisri T.                                                                                            |                               |
| Prevalence of Alpha thalassemia in microcytic anemia: A tertiary care experience from north India                                                              | Sharma M., Pandey S., Ranjan R., Seth T., Saxena R.                                                                                                         | 10.4084/MJHID.2015.004        |
| Increasing prevalence of thalassemia in America: Implications for primary care                                                                                 | Sayani F.A., Kwiatkowski J.L.                                                                                                                               | 10.3109/07853890.2015.1091942 |
| Known and new hemoglobin A2 variants in Thailand and implication for $\beta$ -thalassemia screening                                                            | Panyasai S., Fucharoen G., Fucharoen S.                                                                                                                     | 10.1016/j.cca.2014.09.003     |
| Coexistence of malaria and thalassemia in malaria endemic areas of Thailand                                                                                    | Kuesap J., Chaijaroenkul W., Rungsirunrat K., Pongjantharasatien K., Na-Bangchang K.                                                                        | 10.3347/kjp.2015.53.3.265     |
| The effect of thalassemia on erythrocyte reference intervals in a representative han Chinese adult population                                                  | Xu J.-H., Hao X.-K., Mu R.-Q., Pan B.-S., Zhang J., Peng M.-T., Wang L.-L., Huang X.-Z., Ma Y.-Y., Zhao M., Guo W., Qiao R., Chen W.-X., Jiang H., Shang H. | 10.7754/Clin.Lab.2014.140905  |
| Medium-based noninvasive preimplantation genetic diagnosis for human $\alpha$ -thalassemias-SEA                                                                | Wu H., Ding C., Shen X., Wang J., Li R., Cai B., Xu Y., Zhong Y., Zhou C.                                                                                   | 10.1097/MD.0000000000000669   |
| Diagnostic pitfalls of less well recognized HbH disease                                                                                                        | Farashi S., Najmabadi H.                                                                                                                                    | 10.1016/j.bcmed.2015.08.003   |
| Population screening and prevention strategies for thalassemias and other hemoglobinopathies of Eastern India: Experience of 18,166 cases                      | Chatterjee T., Chakravarty A., Chakravarty S.                                                                                                               | 10.3109/03630269.2015.1068799 |
| Risk factors for malaria and adverse birth outcomes in a prospective cohort of pregnant women resident in a high malaria transmission area of Papua New Guinea | Stanisic D.I., Moore K.A., Baiwog F., Ura A., Clapham C., King C.L., Siba P.M., Beeson J.G., Mueller I., Fowkes F.J., Rogerson S.J.                         | 10.1093/trstmh/trv019         |
| Mutation screening for thalassaemia in the Jino ethnic minority population of Yunnan Province, Southwest China                                                 | Wang S., Zhang R., Xiang G., Li Y., Hou X., Jiang F., Jiang F., Hu C., Jia W.                                                                               | 10.1136/bmjopen-2015-010047   |

|                                                                                                                                                                      |                                                                                                                                                                                                         |                               |
|----------------------------------------------------------------------------------------------------------------------------------------------------------------------|---------------------------------------------------------------------------------------------------------------------------------------------------------------------------------------------------------|-------------------------------|
| Identification of Hb Constant Spring (HBA2: C.427T > C) by an Automated High Performance Liquid Chromatography Method                                                | Wisedpanichkij R., Jindadamrongwech S., Butthep P.                                                                                                                                                      | 10.3109/03630269.2015.1027828 |
| Hemoglobin e and glucose-6-phosphate dehydrogenase deficiency and plasmodium falciparum malaria in the chittagong hill districts of Bangladesh                       | Shannon K.L., Ahmed S., Rahman H., Prue C.S., Khyang J., Ram M., Haq M.Z., Chowdhury A., Akter J., Glass G.E., Shields T., Nyunt M.M., Khan W.A., Sack D.A., Sullivan D.J.                              | 10.4269/ajtmh.14-0623         |
| Genetic hemoglobin disorders rather than iron deficiency are a major predictor of hemoglobin concentration in women of reproductive age in rural prey veng, Cambodia | Karakochuk C.D., Whitfield K.C., Barr S.I., Lamers Y., Devlin A.M., Vercauteren S.M., Kroeun H., Talukder A., McLean J., Green T.J.                                                                     | 10.3945/jn.114.198945         |
| Genotyping of $\alpha$ -thalassemias by the colorimetric nanogold probes                                                                                             | Chomean S., Wangmaung N., Sritongkham P., Promptmas C., Ittarat W.                                                                                                                                      | 10.1016/j.cca.2014.07.033     |
| A large cohort of hemoglobin variants in thailand: Molecular epidemiological study and diagnostic consideration                                                      | Srivorakun H., Singha K., Fucharoen G., Sanchaisuriya K., Fucharoen S.                                                                                                                                  | 10.1371/journal.pone.0108365  |
| Molecular epidemiological characterization and health burden of thalassemia in Jiangxi Province, P. R. China                                                         | Lin M., Zhong T.-Y., Chen Y.-G., Wang J.-Z., Wu J.-R., Lin F., Tong X., Yang H.-T., Hu X.-M., Hu R., Zhan X.-F., Yang H., Luo Z.-Y., Li W.-Y., Yang L.-Y.                                               | 10.1371/journal.pone.0101505  |
| Molecular characterization of $\alpha$ - and $\beta$ -thalassaemia among Malay patients                                                                              | Mohd Yatim N.F., Abd. Rahim M., Menon K., Al-Hassan F.M., Ahmad R., Manocha A.B., Saleem M., Yahaya B.H.                                                                                                | 10.3390/ijms15058835          |
| A simple and highly sensitive elisa for screening of the $\alpha$ -thalassemia-1 southeast asian-type deletion                                                       | Pata S., Khummuang S., Pornprasert S., Tatu T., Kasinrerak W.                                                                                                                                           | 10.1080/15321819.2013.838963  |
| The prevalence and molecular spectrum of $\alpha$ - and $\beta$ -globin gene mutations in 14,332 families of Guangdong Province, China                               | Yin A., Li B., Luo M., Xu L., Wu L., Zhang L., Ma Y., Chen T., Gao S., Liang J., Guo H., Qin D., Wang J., Yuan T., Wang Y., Huang W.-W., He W.-F., Zhang Y., Liu C., Xia S., Chen Q., Zhao Q., Zhang X. | 10.1371/journal.pone.0089855  |
| Interaction of hemoglobin Grey Lynn (Vientiane) with a non-deletional $\alpha$ + -thalassemia in an adult Thai proband                                               | Singha K., Fucharoen G., Fucharoen S.                                                                                                                                                                   | 10.11613/bm.2014.019          |
| A newly modified hemoglobin h inclusion test as a secondary screening for $\alpha$ 0-thalassemia in southeast asian populations                                      | Fucharoen G., Yooyen K., Chaibunruang A., Fucharoen S.                                                                                                                                                  | 10.1159/000355187             |
| ARKRAY ADAMS A1c HA-8180T analyzer for diagnosis of                                                                                                                  | Kunwandee J., Srivorakun H., Fucharoen G., Sanchaisuriya K., Fucharoen S.                                                                                                                               | 10.1309/LMmh649poetqrex1      |

|                                                                                                                                                                                       |                                                                                                                                                        |                              |
|---------------------------------------------------------------------------------------------------------------------------------------------------------------------------------------|--------------------------------------------------------------------------------------------------------------------------------------------------------|------------------------------|
| thalassemia and hemoglobinopathies common in southeast Asia                                                                                                                           |                                                                                                                                                        |                              |
| The correlation of $\alpha$ -globin gene mutations and the XmnI polymorphism with clinical severity of Hb E/ $\beta$ -thalassemia                                                     | Charoenkwan P., Teerachaimahit P., Sanguanersmsri T.                                                                                                   | 10.3109/03630269.2014.952744 |
| Hb Cibeles [ $\alpha$ 2 CD25(B6) (Gly $\rightarrow$ Asp)]: a novel alpha chain variant causing alpha-thalassemia                                                                      | de la Fuente-Gonzalo F., Nieto J.M., Vinuesa L., Sevilla J., Díaz-Mediavilla J., Villegas A., González F.A., Ropero P.                                 | 10.1007/s12185-014-1663-2    |
| Phenotypic expression of Hb F in common high Hb F determinants in Thailand: Roles of $\alpha$ -thalassemia, 5' $\delta$ -globin BCL11A binding region and 3' $\beta$ -globin enhancer | Prakobkaew N., Fucharoen S., Fuchareon G., Siriratmanawong N.                                                                                          | 10.1111/ejh.12201            |
| Prevalence of mutations of alpha Globin gene in suspected alpha carrier couples, Babolsar, 2006-2011                                                                                  | Valizadeh F., Deylami A.                                                                                                                               |                              |
| Five hemoglobin variants in a double heterozygote for $\alpha$ - and $\beta$ -globin chain defects                                                                                    | Singha K., Fucharoen G., Fucharoen S.                                                                                                                  | 10.1159/000353123            |
| Development of bead-based suspension array technology for the diagnosis of thalassemia                                                                                                | Yin A., Zhang L., Luo M., He T., Zhang Y., Liu C., Du L., Qin D., Liang J., Li B., Wu L., Ma Y., Guo H., Wang J., Yuan T., Wang Y., Zhang Y., Zhang X. | 10.1002/ajh.23830            |
| Molecular characteristic of alpha thalassaemia among patients diagnosed in UKM medical centre                                                                                         | Azma R.Z., Ainoon O., Hafiza A., Azlin I., Noor Farisah A.R., Nor Hidayati S., Noor Hamidah H.                                                         |                              |
| Diagnostic utility of isoelectric focusing and high performance liquid chromatography in neonatal cord blood screening for thalassemia and non-sickling hemoglobinopathies            | Uaprasert N., Settapiboon R., Amornsiriwat S., Samthammakul P., Thanapat T., Rojnuckarin P., Sutcharitchan P.                                          | 10.1016/j.cca.2013.09.041    |
| Measurement of HbA2 by capillary electrophoresis for diagnosing $\beta$ -thalassemia/HbE disease in patients with low hbf                                                             | Prasing W., Pornprasert S.                                                                                                                             | 10.1309/LMGD96HES3DZRBZ M    |
| Alpha thalassaemia in tribal communities of coastal maharashtra, India                                                                                                                | Deo M.G., Pawar P.V.                                                                                                                                   |                              |
| The $\alpha$ -Thalassemias                                                                                                                                                            | Piel F.B., Weatherall D.J.                                                                                                                             | 10.1056/NEJMra1404415        |
| Thalassemia and hemoglobin e in southern Thai blood donors                                                                                                                            | Nuinoon M., Kruachan K., Sengking W., Horpet D., Sungyuan U.                                                                                           | 10.1155/2014/932306          |
| State of the art and new developments in molecular                                                                                                                                    | Hartevelde C.L.                                                                                                                                        | 10.1111/ijlh.12108           |

|                                                                                                                                                              |                                                                                                                               |                              |
|--------------------------------------------------------------------------------------------------------------------------------------------------------------|-------------------------------------------------------------------------------------------------------------------------------|------------------------------|
| diagnostics for hemoglobinopathies in multiethnic societies                                                                                                  |                                                                                                                               |                              |
| Variability of hemoglobin F expression in hemoglobin EE disease: Hematological and molecular analysis                                                        | Pakdee N., Yamsri S., Fucharoen G., Sanchaisuriya K., Pissard S., Fucharoen S.                                                | 10.1016/j.bcmed.2014.02.005  |
| Clinical Features and Molecular Analysis of Hb H Disease in Taiwan                                                                                           | Chao Y.-H., Wu K.-H., Wu H.-P., Liu S.-C., Peng C.-T., Lee M.-S.                                                              | 10.1155/2014/271070          |
| Pattern of hemoglobinopathies and thalassemias in upper Assam region of North Eastern India: High performance liquid chromatography studies in 9000 patients | Baruah M.K., Saikia M., Baruah A.                                                                                             | 10.4103/0377-4929.134680     |
| Hemoglobin Constant Spring is markedly high in women of an ethnic minority group in Vietnam: A community-based survey and hematologic features               | Nguyen V.H., Sanchaisuriya K., Wongprachum K., Nguyen M.D., Phan T.T.H., Vo V.T., Sanchaisuriya P., Fucharoen S., Schelp F.P. | 10.1016/j.bcmed.2013.12.002  |
| Routine screening for $\alpha$ -thalassaemia using an immunochromatographic strip assay for haemoglobin bart's                                               | Prayalaw P., Fucharoen G., Fucharoen S.                                                                                       | 10.1177/0969141314538611     |
| Prevention and control of Hb Bart's Disease in Guangxi Zhuang Autonomous Region, China                                                                       | He S., Zhang Q., Li D., Chen S., Tang Y., Chen Q., Zheng C.                                                                   | 10.1016/j.ejogrb.2014.03.034 |
| Effect of Swiss-type heterocellular HPFH from XmnI-G $\gamma$ and HBBP1 polymorphisms on HbF, HbE, MCV and MCH levels in Thai HbE carriers                   | Kerdpoo S., Limweerapajak E., Tatu T.                                                                                         | 10.1007/s12185-014-1516-z    |
| An evolutionary perspective of how infection drives human genome diversity: The case of malaria                                                              | Mangano V.D., Modiano D.                                                                                                      | 10.1016/j.coi.2014.06.004    |
| Thalassemias-pathophysiology, molecular basics and diagnostics [Talasemie - patofizjologia, podstawy molekularne i diagnostyka]                              | Turowski P., Uhrynowska M., Brojer E.                                                                                         |                              |
| Isothermal strand-displacement polymerase reaction for visual detection of the southeast Asian-type deletion of $\alpha$ -thalassemia                        | Yu L., Wu W., Lie P., Liu Y., Zeng L.                                                                                         | 10.1016/j.jmoldx.2013.06.003 |

|                                                                                                                                                    |                                                                                                                                       |                              |
|----------------------------------------------------------------------------------------------------------------------------------------------------|---------------------------------------------------------------------------------------------------------------------------------------|------------------------------|
| Diagnosis and prevention of thalassemia                                                                                                            | Ip H.-W., So C.-C.                                                                                                                    | 10.3109/10408363.2013.847236 |
| Burden of anemia in relation to thalassemia and iron deficiency among vietnamese pregnant women                                                    | Siridamrongvattana S., Van Hoa N., Sanchaisuriya K., Dung N., Hoa P.T.T., Sanchaisuriya P., Fucharoen G., Fucharoen S., Schelp F.P.   | 10.1159/000351168            |
| Hematological characterization of compound heterozygous hemoglobin Hope/E patients with and without $\alpha$ -Thalassemia-1 SEA type deletion      | Pornprasert S.                                                                                                                        | 10.7754/Clin.Lab.2013.130139 |
| Fetal red blood cell parameters in thalassemia and hemoglobinopathies                                                                              | Karnpean R., Fucharoen G., Fucharoen S., Ratanasiri T.                                                                                | 10.1159/000354343            |
| Strategies for basic laboratory diagnostics of the hemoglobinopathies in multi-ethnic societies: Interpretation of results and pitfalls            | Giordano P.C.                                                                                                                         | 10.1111/ijlh.12037           |
| Distribution of alpha thalassaemia gene variants in diverse ethnic populations in Malaysia: Data from the institute for medical Research           | Ahmad R., Saleem M., Aloysious N.S., Yelumalai P., Mohamed N., Hassan S.                                                              | 10.3390/ijms140918599        |
| Prenatal control of nondeletional $\alpha$ -thalassemia: First experience in mainland china                                                        | Li J., Li R., Zhou J.-Y., Xie X.-M., Liao C., Li D.-Z.                                                                                | 10.1002/pd.4149              |
| Discussion                                                                                                                                         | Agarwal A.M., Nussenzeig R.H., Hoke C., Lorey T.S., Greene D.N.                                                                       | 10.1309/AJCPF4UIJKH3EOBY     |
| Problems in determining thalassemia carrier status in a program for prevention and control of severe thalassemia syndromes: A lesson from Thailand | Viprakasit V., Limwongse C., Sukpanichnant S., Ruangvutilert P., Kanjanakorn C., Glomglao W., Sirikong M., Utto W., Tanphaichitr V.S. | 10.1515/cclm-2013-0098       |
| Molecular and hematological studies in a large cohort of $\alpha$ 0-thalassemia in northeast Thailand: Data from a single referral center          | Chaibunruang A., Prommetta S., Yamsri S., Fucharoen G., Sae-Ung N., Sanchaisuriya K., Fucharoen S.                                    | 10.1016/j.bcnd.2013.04.003   |
| Evaluation and comparison of soluble transferrin receptor in thalassemia carriers and iron deficient patients                                      | Khatami S., Dehnabeh S.R., Mostafavi E., Kamalzadeh N., Yaghmaei P., Saeedi P., Shariat F., Bagheriyan H., Zeinali S., Akbari M.T.    | 10.3109/03630269.2013.780248 |
| Low cost biosensor-based molecular differential diagnosis of $\alpha$ -thalassemia (Southeast Asia deletion)                                       | Wangmaung N., Promptmas C., Chomean S., Sanchomphu C., Ittarat W.                                                                     | 10.1515/cclm-2012-0732       |

|                                                                                                                                                                                                                |                                                                                                                                                                                                                                                                                                                                                                                                                                                                  |                              |
|----------------------------------------------------------------------------------------------------------------------------------------------------------------------------------------------------------------|------------------------------------------------------------------------------------------------------------------------------------------------------------------------------------------------------------------------------------------------------------------------------------------------------------------------------------------------------------------------------------------------------------------------------------------------------------------|------------------------------|
| Diagnostic testing for $\alpha$ -globin gene disorders in a heterogeneous North American population                                                                                                            | Waye J.S., Eng B.                                                                                                                                                                                                                                                                                                                                                                                                                                                | 10.1111/ijlh.12066           |
| Prenatal and newborn screening for hemoglobinopathies                                                                                                                                                          | Hoppe C.C.                                                                                                                                                                                                                                                                                                                                                                                                                                                       | 10.1111/ijlh.12076           |
| Treating iron overload in patients with non-transfusion-dependent thalassemia                                                                                                                                  | Taher A.T., Viprakasit V., Musallam K.M., Cappellini M.D.                                                                                                                                                                                                                                                                                                                                                                                                        | 10.1002/ajh.23405            |
| Effectiveness of the model for prenatal control of severe thalassemia                                                                                                                                          | Tongsong T., Charoenkwan P., Sirivatanapa P., Wanapirak C., Piyamongkol W., Sirichotiyakul S., Srisupundit K., Tongprasert F., Luewan S., Ratanasiri T., Komwilaisak R., Saksiriwuttho P., Vuthiwong C., Punpuckdeekoon P., Panichkul P., Rueangchainikhom W., Choowong J., Orungrote N., Sarapak S., Kovavisarach E., Jaruyawongs P., Tansathit T., Phadungkiatwattana P., Rujiwetpongstorn J., Kor-Anantakul O., Suwanrath C., Hanprasertpong T., Pranpanus S. | 10.1002/pd.4095              |
| Detection of coinherited Hb H-constant spring/Paksé disease and Hb e by capillary electrophoresis and high performance liquid chromatography                                                                   | Pornprasert S., Waneesorn J.                                                                                                                                                                                                                                                                                                                                                                                                                                     | 10.3109/03630269.2012.752744 |
| Evidence of recent natural selection on the Southeast Asian deletion ( - SEA) causing $\alpha$ -thalassemia in South China                                                                                     | Qiu Q.-W., Wu D.-D., Yu L.-H., Yan T.-Z., Zhang W., Li Z.-T., Liu Y.-H., Zhang Y.-P., Xu X.-M.                                                                                                                                                                                                                                                                                                                                                                   | 10.1186/1471-2148-13-63      |
| Diagnosis of $\alpha$ -thalassemia-1 southeast Asian type deletion and fetal gender by single-tube multiplex real-time PCR                                                                                     | Srithep S., Kongthai K., Pornprasert S.                                                                                                                                                                                                                                                                                                                                                                                                                          | 10.7754/Clin.Lab.2012.120217 |
| Alpha-thalassemia mental retardation syndrome: A case report of two affected siblings                                                                                                                          | Latiff Z.A., Omar S.A.S., Lau D., Wong S.W., Ong L.C., Aziz D.A., Akmal S.N.                                                                                                                                                                                                                                                                                                                                                                                     | 10.3233/JPN-120598           |
| Association of Hb thailand [ $\alpha$ 56(E5)Lys→Thr] and Hb phnom penh [ $\alpha$ 117(GH5)-Ile- $\alpha$ 118(H1)] with $\alpha$ 0-Thalassemia: Molecular and hematological features and differential diagnosis | Singha K., Srivorakun H., Fucharoen G., Changtrakul Y., Komwilaisak P., Jetsrisuparb A., Puangplruk R., Fucharoen S.                                                                                                                                                                                                                                                                                                                                             | 10.3109/03630269.2012.747964 |
| Identification of hemoglobin variants in samples received for glycated hemoglobin testing                                                                                                                      | Saw S., Loh T.P., Yin C., Sethi S.K.                                                                                                                                                                                                                                                                                                                                                                                                                             | 10.1016/j.cca.2012.10.043    |
| Automated capillary electrophoresis in the screening for hemoglobinopathies                                                                                                                                    | Cotton F., Wolff F., Gulbis B.                                                                                                                                                                                                                                                                                                                                                                                                                                   | 10.1007/978-1-62703-296-4_16 |

|                                                                                                                                                                                     |                                                                                                                                                                                                                                         |                               |
|-------------------------------------------------------------------------------------------------------------------------------------------------------------------------------------|-----------------------------------------------------------------------------------------------------------------------------------------------------------------------------------------------------------------------------------------|-------------------------------|
| Distribution of alpha thalassaemia in 16 year old Malaysian students in Penang, Melaka and Sabah                                                                                    | Ahmad R., Sabrina N., Bahrin S., Hassan R., Yelumalai P., Hidayat N., Hassan S., Zakaria Z.                                                                                                                                             |                               |
| Artemisinin-resistant Plasmodium falciparum in Pursat province, western Cambodia: A parasite clearance rate study                                                                   | Amaratunga C., Sreng S., Suon S., Phelps E.S., Stepniewska K., Lim P., Zhou C., Mao S., Anderson J.M., Lindegardh N., Jiang H., Song J., Su X.-Z., White N.J., Dondorp A.M., Anderson T.J.C., Fay M.P., Mu J., Duong S., Fairhurst R.M. | 10.1016/S1473-3099(12)70181-0 |
| Resistance to malaria in humans: The impact of strong, recent selection                                                                                                             | Hedrick P.W.                                                                                                                                                                                                                            | 10.1186/1475-2875-11-349      |
| Prevalence of iron deficiency anaemia and thalassaemia trait among undergraduate medical students                                                                                   | Azma R.Z., Ainoon O., Azlin I., Hamenuddin H., Hadi N.A., Tatt W.K., Syazana I.N., Asmaliza A.M., Das S., Hamidah N.H.                                                                                                                  |                               |
| Development of a fluorescence immunochromatographic assay for the detection of zeta globin in the blood of (--SEA) $\alpha$ -thalassemia carriers                                   | Wen L., Zhu P., Liu Y., Pan Q., Qu Y., Xu X., Li X., Fu N.                                                                                                                                                                              | 10.1016/j.bcmed.2012.05.011   |
| A spurious haemoglobin A1c result associated with double heterozygote for haemoglobin Raleigh ( $\beta$ 1[NA1]Val $\rightarrow$ Ala) and $\alpha$ +thalassaemia                     | Singha K., Fucharoen G., Chaibunruang A., Netnee P., Fucharoen S.                                                                                                                                                                       | 10.1258/acb.2012.011234       |
| The contribution of extramedullary hematopoiesis to hepatomegaly in anemic hydrops fetalis: A study in alpha-thalassemia hydrops fetalis                                            | Taweevisit M., Thorner P.S.                                                                                                                                                                                                             | 10.2350/11-12-1126-OA.1       |
| The spectrum of $\alpha$ -and $\beta$ -thalassemia mutations in Yunnan Province of southwestern China                                                                               | Zhang J., Zhu B.-S., He J., Zeng X.-H., Su J., Xu X.-H., Li S.-Y., Chen H., Zhang Y.-H.                                                                                                                                                 | 10.3109/03630269.2012.717327  |
| Unmasking Hb Paksé (codon 142, TAA>TAT, $\alpha$ 2) and its combinations in patients also carrying Hb constant spring (codon 142, TAA>CAA, $\alpha$ 2) in Northern Thailand         | Pornprasert S., Panyasai S., Treesuwan K.                                                                                                                                                                                               | 10.3109/03630269.2012.709896  |
| Microsatellite markers within the $\alpha$ -globin gene cluster for robust preimplantation genetic diagnosis of severe $\alpha$ -Thalassemia syndromes in mediterranean populations | Destouni A., Christopoulos G., Vrettou C., Kakourou G., Kleanthous M., Traeger-Synodinos J., Kanavakis E.                                                                                                                               | 10.3109/03630269.2012.666512  |
| Screening for co-existence of $\alpha$ -thalassemia in $\beta$ -thalassemia                                                                                                         | Tatu T., Khuntarak S., Suwannasin S., Kiewkarnkha T., Khamrin S., Kasinrerak W.                                                                                                                                                         | 10.1007/s12185-012-1039-4     |



|                                                                                                                                                                             |                                                                                                                                             |                                          |
|-----------------------------------------------------------------------------------------------------------------------------------------------------------------------------|---------------------------------------------------------------------------------------------------------------------------------------------|------------------------------------------|
| and in HbE heterozygotes via an enzyme-linked immunosorbent assay for Hb Bart's and embryonic $\zeta$ -globin chain                                                         |                                                                                                                                             |                                          |
| Quantification of hemoglobin Constant Spring in heterozygote and homozygote by a capillary electrophoresis method                                                           | Pornprasert S., Panyasai S., Waneesorn J., Kongthai K., Singboottra P.                                                                      | 10.1111/j.1751-553X.2011.01371.x         |
| Genetic hemoglobin disorders, infection, and deficiencies of iron and vitamin A determine anemia in young Cambodian children                                                | George J., Yiannakis M., Main B., Devenish R., Anderson C., An U.S., Williams S.M., Gibson R.S.                                             | 10.3945/jn.111.148189                    |
| Classification of complete blood count and haemoglobin typing data by a C4.5 decision tree, a naïve Bayes classifier and a multilayer perceptron for thalassaemia screening | Setsirichok D., Piroonratana T., Wongseeree W., Usavanarong T., Paulkhaolarn N., Kanjanakorn C., Sirikong M., Limwongse C., Chaiyaratana N. | 10.1016/j.bspsc.2011.03.007              |
| Limit of sensitivity for melting curve screening for $\alpha$ -thalassemia                                                                                                  | Sriiam S., Leecharoenkiat A., Lithanatudom P., Munkongdee T., Svasti S., Smith D.R.                                                         | 10.5372/1905-7415.0601.134               |
| Micromapping of thalassemia and hemoglobinopathies in different regions of Northeast Thailand and Vientiane, Laos People's Democratic Republic                              | Tritipsombut J., Sanchaisuriya K., Phollarp P., Bouakhasith D., Sanchaisuriya P., Fucharoen G., Fucharoen S., Schelp F.P.                   | 10.3109/03630269.2011.637149             |
| Phenotypic expression of hemoglobins A2, E and F in various hemoglobin E related disorders                                                                                  | Sae-ung N., Srivorakun H., Fucharoen G., Yamsri S., Sanchaisuriya K., Fucharoen S.                                                          | 10.1016/j.bcmed.2011.09.008              |
| The prevalence of $\alpha$ thalassemia in South Western Maharashtra                                                                                                         | Momin A.A., Bankar M.P., Bhoite G.M.                                                                                                        |                                          |
| New updating into hemoglobinopathies                                                                                                                                        | Fucharoen S., Winichagoon P.                                                                                                                | 10.1111/j.1751-553X.2012.01446.x         |
| Detection of common deletions and mutations causing $\alpha$ -thalassemia in Southeast Asians and Southern Chinese with denaturing high performance liquid chromatography   | Jia X.-Y., Wei X.-J., Tang N., Wang L.-R., Han H., Zheng M.-L., Cai R., Xiao B., Liu J.-Z.                                                  | 10.3760/cma.j.issn.1003-9406.2011.06.016 |
| Alpha thalassemia major - A hematological prelude to an oncological problem                                                                                                 | Pant S.                                                                                                                                     | 10.1016/j.mehy.2011.07.037               |
| Haemoglobinopathies in Southeast Asia                                                                                                                                       | Fucharoen S., Winichagoon P.                                                                                                                |                                          |
| A rapid detection for $\alpha$ -thalassemia by PCR combined with dissociation curve analysis                                                                                | Jia X., Liu J., Wang L., Yao L., Tang N., Cai R., Xiao B.                                                                                   | 10.1016/j.yexmp.2011.06.013              |

|                                                                                                                                                                                                                                      |                                                                                                         |                                   |
|--------------------------------------------------------------------------------------------------------------------------------------------------------------------------------------------------------------------------------------|---------------------------------------------------------------------------------------------------------|-----------------------------------|
| Hb E/beta-thalassaemia: A common & clinically diverse disorder                                                                                                                                                                       | Olivieri N.F., Pakbaz Z., Vichinsky E.                                                                  |                                   |
| How I treat thalassemia                                                                                                                                                                                                              | Rachmilewitz E.A., Giardina P.J.                                                                        | 10.1182/blood-2010-08-300335      |
| Preimplantation genetic diagnosis for $\alpha$ - and $\beta$ -double thalassemia                                                                                                                                                     | Shen X., Xu Y., Zhong Y., Zhou C., Zeng Y., Zhuang G., Ding C., Li T.                                   | 10.1007/s10815-011-9598-5         |
| Molecular analysis of globin gene expression in different thalassaemia disorders: Individual variation of $\beta$ E pre-mRNA splicing determine disease severity                                                                     | Tubsuwan A., Munkongdee T., Jearawiriyapaisarn N., Boonchoy C., Winichagoon P., Fucharoen S., Svasti S. | 10.1111/j.1365-2141.2011.08770.x  |
| Genotype and phenotype characterizations in a large cohort of $\beta$ -thalassemia heterozygote with different forms of $\beta$ -thalassemia in northeast Thailand                                                                   | Yamsri S., Sanchaisuriya K., Fucharoen G., Sae-ung N., Fucharoen S.                                     | 10.1016/j.bcmed.2011.05.003       |
| Comparison between capillary electrophoresis and high performance liquid chromatography for detection and quantification of Hb constant spring [Hb CS; $\alpha$ 142, Term $\rightarrow$ Gln (TAA>CAA in $\alpha$ 2)]                 | Waneesorn J., Panyasai S., Kongthai K., Singboottra P., Pornprasert S.                                  | 10.3109/03630269.2011.588140      |
| Detection of $\alpha$ -thalassemia-1 Southeast Asian and Thai type deletions and $\beta$ -thalassemia 3.5-kb deletion by single-tube multiplex real-time PCR with SYBR green 1 and high-resolution melting analysis                  | Pornprasert S., Wiengkum T., Srithep S., Chainoi I., Singboottra P., Wongwiwatthananut S.               | 10.3343/kjlm.2011.31.3.138        |
| Evaluation of the URIT-2900 Automated Hematology Analyzer for screening of thalassemia and hemoglobinopathies in Southeast Asian populations                                                                                         | Karnpean R., Pansuwan A., Fucharoen G., Fucharoen S.                                                    | 10.1016/j.clinbiochem.2011.04.009 |
| Complex interaction of hemoglobin (Hb) Nakhon Ratchasima [ $\alpha$ 63(E12)Ala $\rightarrow$ Val], a novel $\alpha$ 2-globin chain variant with Hb E [ $\beta$ 26(B8)Glu $\rightarrow$ Lys] and a deletional $\alpha$ + -thalassemia | Srivorakun H., Fucharoen G., Puangplruk R., Kheawon N., Fucharoen S.                                    | 10.1111/j.1600-0609.2011.01616.x  |
| Accuracy of immunochromatographic strip test in diagnosis of alpha-thalassemia-1 carrier                                                                                                                                             | Wanapirak C., Piyamongkol W., Sirichotiyakul S., Tayapiwatana C., Kasinrerk W., Tongsong T.             |                                   |

|                                                                                                                                                                                                                                                        |                                                                                                                |                                   |
|--------------------------------------------------------------------------------------------------------------------------------------------------------------------------------------------------------------------------------------------------------|----------------------------------------------------------------------------------------------------------------|-----------------------------------|
| Hematological characteristics and effective screening for compound heterozygosity for Hb constant spring and deletional $\alpha^+$ -thalassemia                                                                                                        | Uaprasert N., Rojnuckarin P., Settapiboon R., Amornsiriwat S., Sutcharitchan P.                                | 10.1002/ajh.22033                 |
| Quantitative analysis of Hb Bart's in cord blood by capillary electrophoresis system                                                                                                                                                                   | Munkongdee T., Pichanun D., Butthep P., Klamchuen S., Chalermprapa V., Winichagoon P., Svasti S., Fucharoen S. | 10.1007/s00277-010-1137-4         |
| Molecular lesion frequency of hemoglobin gene disorders in Taiwan                                                                                                                                                                                      | Liu S.-C., Peng C.-T., Lin T.-H., Wang S.-J., Shih M.-C., Tien N., Chang C.-C., Lu J.-J., Lin C.-Y.            | 10.3109/03630269.2011.572524      |
| Molecular characterization of two new mutations of $\alpha^o$ thalassemia in two Spanish families (mutation - ED and - GP) [Caracterización molecular de dos nuevas mutaciones de $\alpha^o$ talasemia en 2 familias españolas (mutación - ED y - GP)] | Villegas A., Roperio P., Anguita E., Hernández A., Polo M., González F.A.                                      | 10.1016/j.medcli.2011.01.015      |
| Thalassemia and hemoglobinopathies in Southeast Asian newborns: Diagnostic assessment using capillary electrophoresis system                                                                                                                           | Srivorakun H., Fucharoen G., Changtrakul Y., Komwilaisak P., Fucharoen S.                                      | 10.1016/j.clinbiochem.2011.01.006 |
| Hb phimai [ $\beta$ 72(E16)Ser→Thr]: A novel $\beta$ -globin structural variant found in association with Hb constant spring in pregnancy                                                                                                              | Singsanan S., Srivorakun H., Fucharoen G., Puangplruk R., Fucharoen S.                                         | 10.3109/03630269.2011.557171      |
| Molecular spectrum of $\alpha$ - and $\beta$ -globin gene mutations detected in the population of Guangxi Zhuang Autonomous Region, People's Republic of China                                                                                         | Zheng C.-G., Liu M., Du J., Chen K., Yang Y., Yang Z.                                                          | 10.3109/03630269.2010.547429      |
| Molecular and hematological characterization of hemoglobin H disease in the Bengali population of Kolkata, India                                                                                                                                       | Dastidar R., Gajra B., De M.                                                                                   | 10.1089/gtmb.2010.0062            |
| Correlation of beta-thalassemia mutations with alpha-thalassemia: An experience of the southwestern region of Iran                                                                                                                                     | Rahim F.                                                                                                       | 10.1179/102453310X12719010991821  |
| HbE/ $\beta$ -thalassemia: Basis of marked clinical diversity                                                                                                                                                                                          | Olivieri N.F., Pakbaz Z., Vichinsky E.                                                                         | 10.1016/j.hoc.2010.08.008         |
| Molecular screening of the Hbs Constant Spring (codon 142, TAA>CAA, $\alpha$ 2) and Paksé (codon 142, TAA>TAT, $\alpha$ 2) mutations in Thailand                                                                                                       | Pichanun D., Munkongdee T., Klamchuen S., Butthep P., Winichagoon P., Fucharoen S., Svasti S.                  | 10.3109/03630269.2010.526914      |

|                                                                                                                                                                                       |                                                                                                                                                                                               |                                  |
|---------------------------------------------------------------------------------------------------------------------------------------------------------------------------------------|-----------------------------------------------------------------------------------------------------------------------------------------------------------------------------------------------|----------------------------------|
| Thalassemia and iron deficiency in a group of northeast Thai school children: Relationship to the occurrence of anemia                                                                | Panomai N., Sanchaisuriya K., Yamsri S., Sanchaisuriya P., Fucharoen G., Fucharoen S., Schelp F.P.                                                                                            | 10.1007/s00431-010-1218-3        |
| Hemoglobin H disease due to a de novo mutation at the $\alpha 2$ -globin gene and an inherited common $\alpha$ -thalassemia deletion found in a Chinese boy                           | Zhu C., Yu W., Xie J., Chen L., Ding H., Shang X., Xu X.                                                                                                                                      | 10.1016/j.bcmed.2010.07.005      |
| Hemoglobin Q-Thailand related disorders: Origin, molecular, hematological and diagnostic aspects                                                                                      | Singsanan S., Karnpean R., Fucharoen G., Sanchaisuriya K., Sae-ung N., Fucharoen S.                                                                                                           | 10.1016/j.bcmed.2010.06.001      |
| Hemoglobin H disease in Guangxi province, Southern China: Clinical review of 357 patients                                                                                             | Yin X.-L., Zhang X.-H., Zhou T.-H., Zhang T.-L., Luo R.-G., Wang L., Zhou Y.-L., Chen Y.-S., Kong X.-J., Liang B., He Y.-Y., Peng L., Lu L.-B., Fang S.-P., Wu Z.-K.                          | 10.1159/000314058                |
| Prevalence of fractures among Thais with Thalassemia syndromes                                                                                                                        | Sutipornpalangkul W., Janechetsadatham Y., siritanaratkul N., Harnroongroj T.                                                                                                                 |                                  |
| Complex interaction of Hb Q-Thailand and Hb e with $\alpha 0$ -thalassemia and hereditary persistence of fetal hemoglobin in a Chinese family                                         | Zheng W., Liu Y., Chen D., Rong K., Ge Y., Gong C., Chen H.                                                                                                                                   | 10.1007/s00277-010-0935-z        |
| Hydrops fetalis in the stillborn: A series from the central region of Thailand                                                                                                        | Taweewisit M., Thorner P.S.                                                                                                                                                                   | 10.2350/09-12-0771-OA.1          |
| Hb Koya Dora [ $\alpha 142$ , Term $\rightarrow$ Ser (TAA $\rightarrow$ TCA in $\alpha 2$ )]: A rare mutation of the $\alpha 2$ gene stop codon associated with $\alpha$ -Thalassemia | Brennan S.O., Ryken S., Chan T.                                                                                                                                                               | 10.3109/03630269.2010.486344     |
| Application of an expanded multiplex genotyping assay for the simultaneous detection of Hemoglobin Constant Spring and common deletion $\alpha$ -thalassemia mutations                | Kidd J.L., Azimi M., Lubin B., Vichinsky E., Hoppe C.                                                                                                                                         | 10.1111/j.1751-553X.2009.01197.x |
| Thalassemia as a global health problem: Recent progress toward its control in the developing countries                                                                                | Weatherall D.J.                                                                                                                                                                               | 10.1111/j.1749-6632.2010.05546.x |
| Pulmonary hypertension in thalassemia                                                                                                                                                 | Morris C.R., Vichinsky E.P.                                                                                                                                                                   | 10.1111/j.1749-6632.2010.05580.x |
| Large scale screening for haemoglobin disorders in southern Vietnam: Implications for avoidance and management                                                                        | O'Riordan S., Hien T.T., Miles K., Allen A., Quyen N.N., Hung N.Q., Anh D.Q., Tuyen L.N., Khoa D.B., Thai C.Q., Triet D.M., Phu N.H., Dunstan S., Peto T., Clegg J., Farrar J., Weatherall D. | 10.1111/j.1365-2141.2010.08237.x |

|                                                                                                                                                                                |                                                                                                      |                                  |
|--------------------------------------------------------------------------------------------------------------------------------------------------------------------------------|------------------------------------------------------------------------------------------------------|----------------------------------|
| Sensitivity and specificity of simple erythrocyte osmotic fragility test for screening of alpha-thalassemia-1 and beta-thalassemia trait in pregnant women                     | Tongprasert F., Sirichotiyakul S., Piyamongkol W., Tongsong T.                                       | 10.1159/000271779                |
| [Detection of deletional alpha-thalassemia from free fetal DNA in maternal plasma].                                                                                            | Chen Y., Ou Q.S., Zhou H.R.                                                                          |                                  |
| Prevention of severe thalassemia in northeast Thailand: 16 Years of experience at a single university center                                                                   | Yamsri S., Sanchaisuriya K., Fucharoen G., Sae-ung N., Ratanasiri T., Fucharoen S.                   | 10.1002/pd.2514                  |
| Molecular confirmatory testing of hemoglobin Constant Spring by real-time polymerase chain reaction SYBR Green1 with high-resolution melting analysis                          | Panyasai S., Sukunthamala K., Pornprasert S.                                                         | 10.1111/j.1600-0609.2010.01437.x |
| $\alpha$ -thalassaemia                                                                                                                                                         | Harteveld C.L., Higgs D.R.                                                                           | 10.1186/1750-1172-5-13           |
| Improvement of $\alpha$ o-thalassemia screening using combined osmotic fragility, dichlorophenolindophenol and Hb H inclusion tests                                            | Chaibunruang A., Pornphannukool S., Sae-Ung N., Fucharoen G., Sanchaisuriya K., Fucharoen S.         |                                  |
| A comprehensive, simple molecular assay of common deletions and mutations causing $\alpha$ -thalassemia in Southeast Asia and southern China                                   | Liu J., Jia X., Tang N., Wang L., Han H., Cai R., Wang Q., Xiao B.                                   | 10.1002/ajh.21671                |
| Rapid diagnosis of $\alpha$ -thalassemia by melting curve analysis                                                                                                             | Munkongdee T., Vattanaviboon P., Thummarati P., Sewamart P., Winichagoon P., Fucharoen S., Svasti S. | 10.2353/jmoldx.2010.090136       |
| High resolution DNA melting analysis: An application for prenatal control of $\alpha$ -thalassemia                                                                             | Sirichotiyakul S., Wanapirak C., Saetung R., Sanguansermisri T.                                      | 10.1002/pd.2480                  |
| Prenatal diagnosis of hemoglobin Bart's disease: What is the noninvasive approach?                                                                                             | Li D.-Z.                                                                                             | 10.1002/pd.2477                  |
| Interactions of hemoglobin Lepore ( $\delta\beta$ hybrid hemoglobin) with various hemoglobinopathies: A molecular and hematological characteristics and differential diagnosis | Chaibunruang A., Srivorakun H., Fucharoen S., Fucharoen G., Sae-ung N., Sanchaisuriya K.             | 10.1016/j.bcnd.2009.11.008       |
| Molecular diversity of hemoglobin H disease in India                                                                                                                           | Nadkarni A.H., Nair S.B., Italia K.Y., Warang P., Dalvi M., Ghosh K., Colah R.B.                     | 10.1309/AJCP70ORBRURVSJM         |
| Hematological features and molecular lesions of                                                                                                                                | Lin H.-J., Shih M.-C., Peng C.-T., Liu T.-C., Chen K.-W., Shih H.-C., Chang J.-G.                    | 10.1111/j.1751-553X.2008.01095.x |

|                                                    |  |  |
|----------------------------------------------------|--|--|
| hemoglobin gene disorders in<br>Taiwanese patients |  |  |
|----------------------------------------------------|--|--|
